# Supplementary material for: Study on the Influence Mechanism of Cobalt and Iron Doping on the Adsorption of H₂S, NO, NO₂ and SO₂ Gas Molecules by Two-Dimensional C₉N₄ Materials
Source: Royal Society of Chemistry journal article supplement (doi:10.1039/d5nj03858h), 2026-01-01
Supplement: d5nj03858h1.pdf [file d5nj03858h1.pdf]

## Study on the Influence Mechanism of Cobalt and Iron Doping on the Adsorption of H<sub>2</sub>S, NO, NO<sub>2</sub> and SO<sub>2</sub> Gas Molecules by Two-Dimensional C<sub>9</sub>N<sub>4</sub> Materials

Yimin Zhang<sup>a</sup>, ZhaoJu Sun<sup>b</sup>, Chao Deng<sup>c, \*</sup>, Long Lin<sup>a</sup>

<sup>a</sup> School of Computer Science, Luoyang Institute of Science and Technology, Luoyang, 471023, China

<sup>b</sup> Henan Key Laboratory of Materials on Deep-Earth Engineering, School of Materials Science and Engineering, Henan Polytechnic University, Jiaozuo 454000, Henan, China.

<sup>c</sup> School of Physics and Electronic Information Engineering, Henan Polytechnic University, Jiaozuo 454000, Henan Province, China

\* corresponding author. [super@hpu.edu.cn](mailto:super@hpu.edu.cn) (C. Deng)

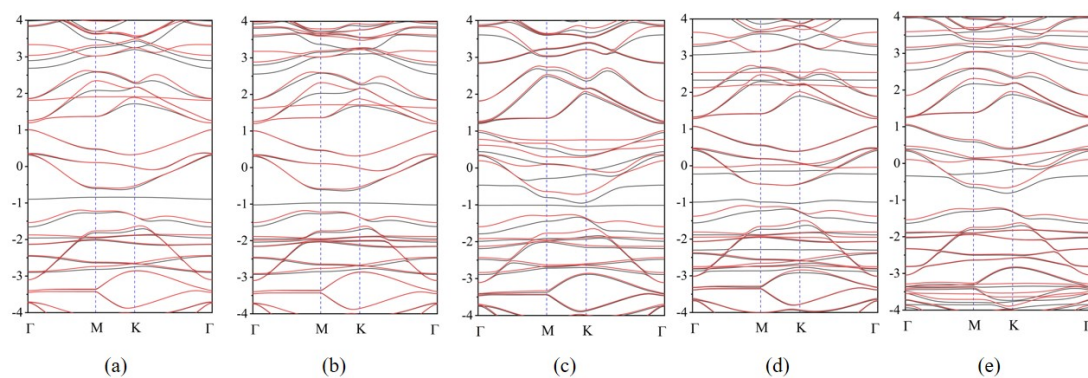

**Fig.S1** Band structures for (a) B-C<sub>9</sub>N<sub>4</sub>, NO<sub>2</sub> ; Band structures for the most favorable adsorption configurations for, (b) H<sub>2</sub>S, (c) NO, (d) NO<sub>2</sub>, (e) SO<sub>2</sub>.
